# Supplementary material for: Exploring the Impact of Stigma, Service Satisfaction, and Social Support on the Quality of Life of People with Mental Illness: A Qualitative Study
Source: Research Square preprint supplement (doi:10.21203/rs.3.rs-7826493/v1), 2025-11-24
Supplement: Supplementary file 1 [file 12c4866e329ff4b0f7e9c330.pdf]

### **Qualitative questions**

1. Please tell me a little about when you were diagnosed with a mental illness and the treatment and support that you have received since then
2. What have been the main impacts of your mental illness in your life (prompt: health, social, economic)
3. How satisfied are you with the service that you get from the outpatient clinic? What are some of the key things that contributed to this? Do you use other services? How satisfied are you with those?
4. What sort of support have you got from your family, friends, and others?
5. Have you encountered stigma by other people? Did you feel stigmatized?
6. How satisfied are you with your life overall?  
(Prompt: health, social, economic)
7. How much does this relate to:
  - a. your mental illness?
  - b. your experiences of treatment and support services?
  - c. social support you have from friends, family
  - d. experiences of stigma
8. What key things would help improve your quality of life?
